# Supplementary material for: Application of TGA/c-DTA for Distinguishing between Two Forms of Naproxen in Pharmaceutical Preparations
Source: MDPI journal article supplement (doi:10.3390/pharmaceutics15061689), 2023-06-08
Supplement: s1 [file s1]

# SUPPLEMENTARY MATERIALS

## Application of TGA/c-DTA for Distinguishing Between Two Forms of Naproxen in Pharmaceutical Preparations

Paweł Ramos<sup>1\*</sup>, Barbara Klaudia Raczak<sup>2,3</sup>, Daniele Silvestri<sup>2</sup>, Stanisław Waclawek<sup>2</sup>

<sup>1</sup> Department of Biophysics, Faculty of Pharmaceutical Sciences in Sosnowiec, Medical University of Silesia in Katowice, Jedności 8, 41-200 Sosnowiec, Poland; pawelramos@sum.edu.pl (P.R.)

<sup>2</sup> Institute for Nanomaterials, Advanced Technologies and Innovation, Technical University of Liberec, Studentská 2, 460 01 Liberec, Czech Republic; stanislav.waclawek@tul.cz (S.W.), barbara.klaudia.raczak@tul.cz (B.K.R.), daniele.silvestri@tul.cz (D.S.)

<sup>3</sup> Faculty of Mechatronics, Informatics and Interdisciplinary Studies, Technical University of Liberec, 461 17 Liberec, Czech Republic; barbara.klaudia.raczak@tul.cz (B.K.R.)

\*Correspondence: pawelramos@sum.edu.pl; Tel.: +480323641164

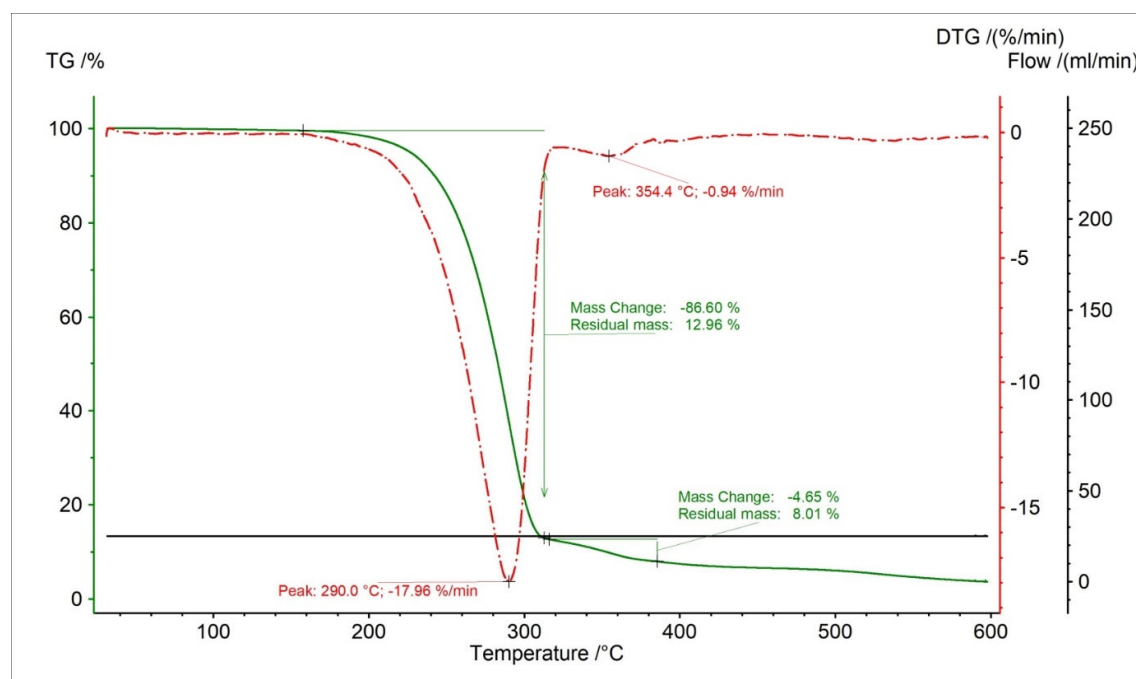

Figure S1. TG (green) and DTG (reed) curves of naproxen acid standard (NAS).

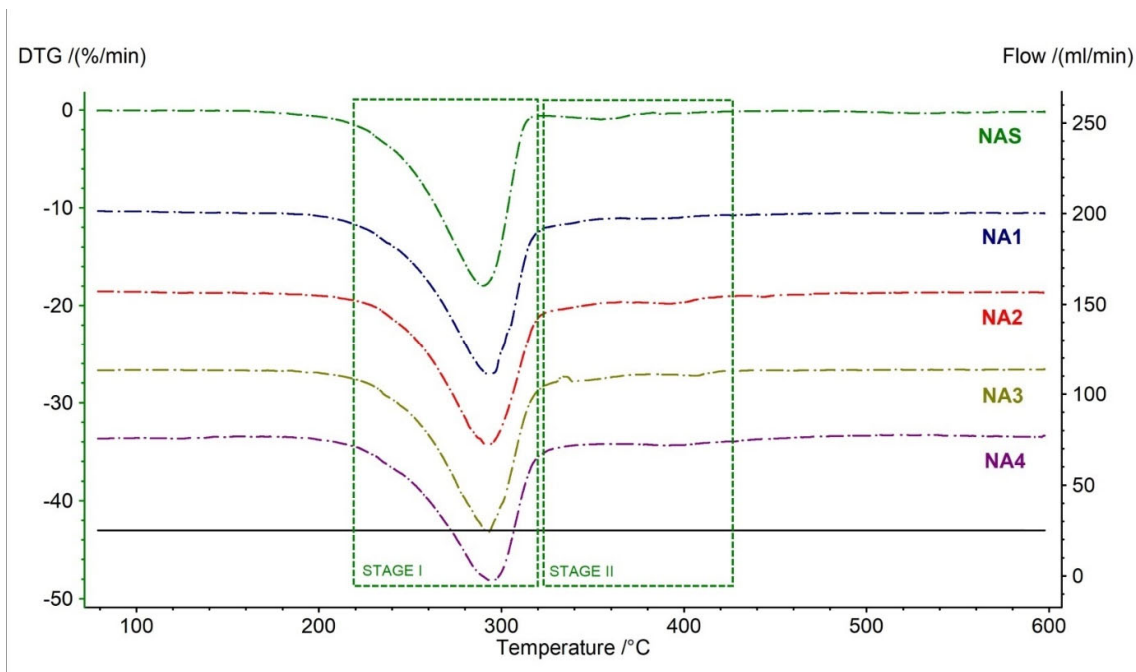

**Figure S2.** DTG curves of naproxen acid standard (NAS), and pharmaceutical preparations containing naproxen acid (NA1-NA4). The green frame shows the stages of decomposition related to the API.

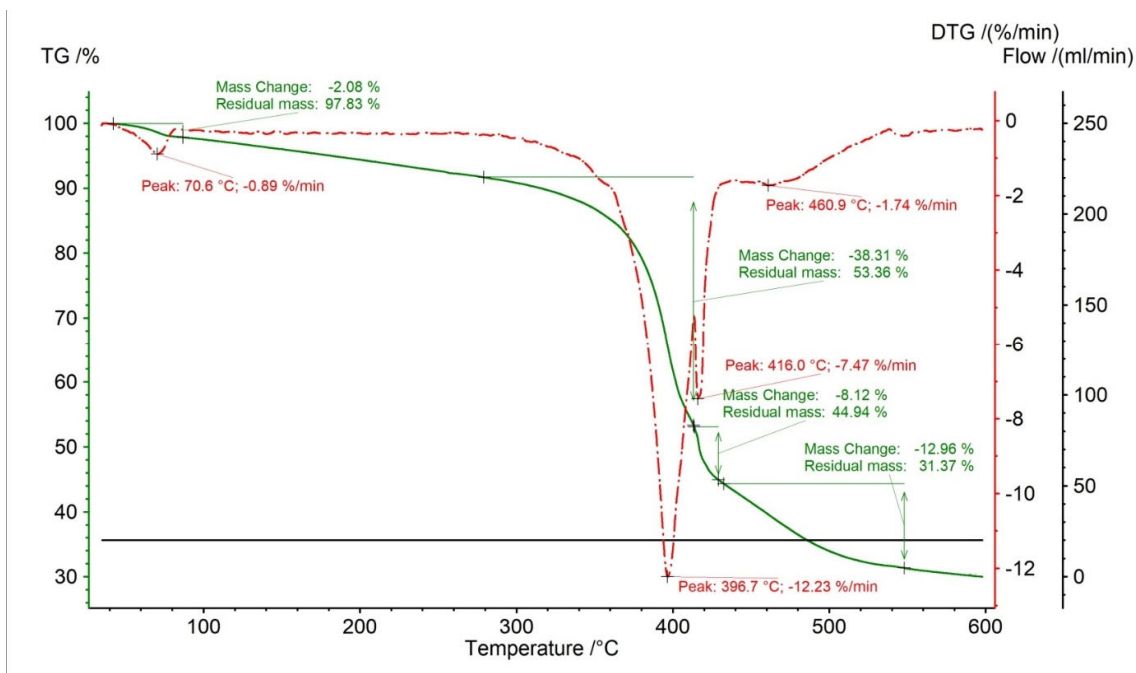

**Figure S3.** TG (green) and DTG (red) curves of naproxen sodium standard (NSS).

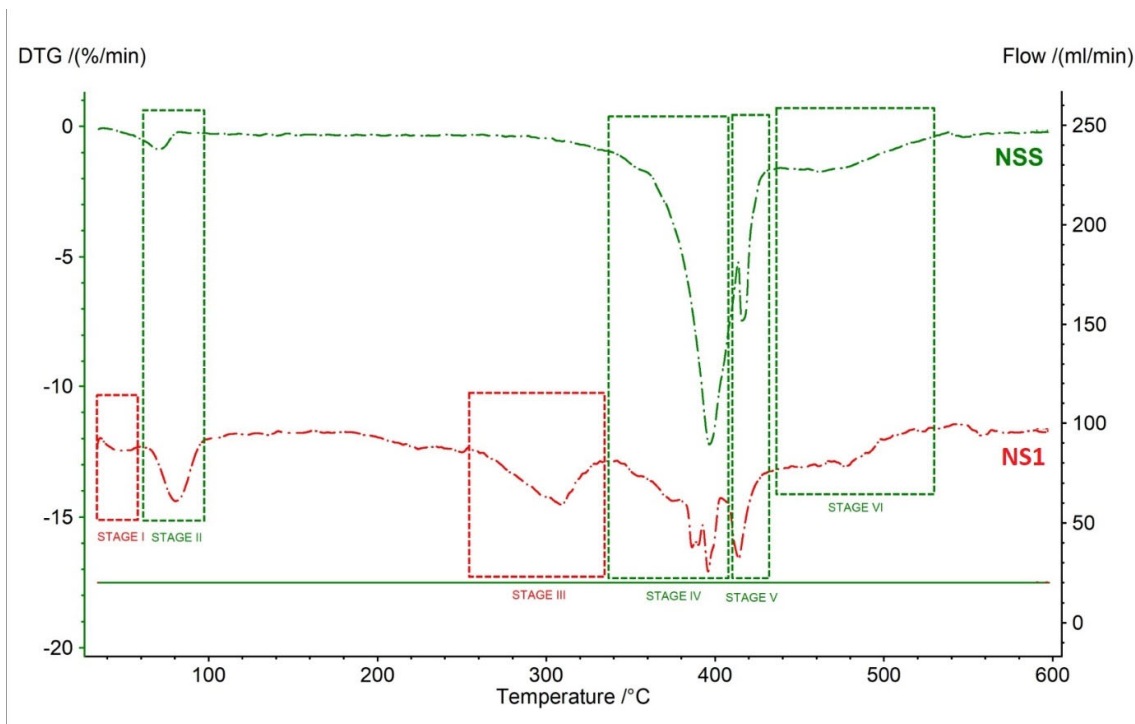

**Figure S4.** DTG curves of naproxen sodium standard (NSS), and pharmaceutical preparation containing naproxen sodium (NS1). The green frame shows the stages of decomposition related to the API, and the red frame - is associated with the excipient.

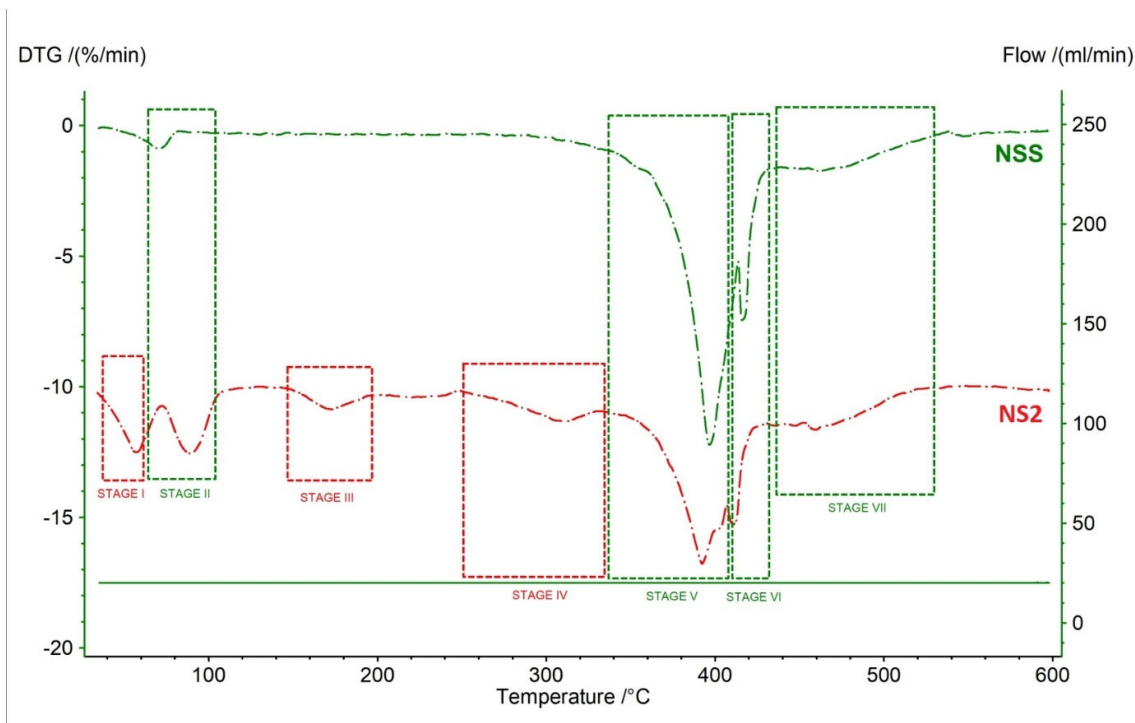

**Figure S5.** DTG curves of naproxen sodium standard (NSS), and pharmaceutical preparation containing naproxen sodium (NS2). The green frame shows the stages of decomposition related to the API, and the red frame - is associated with the excipient.

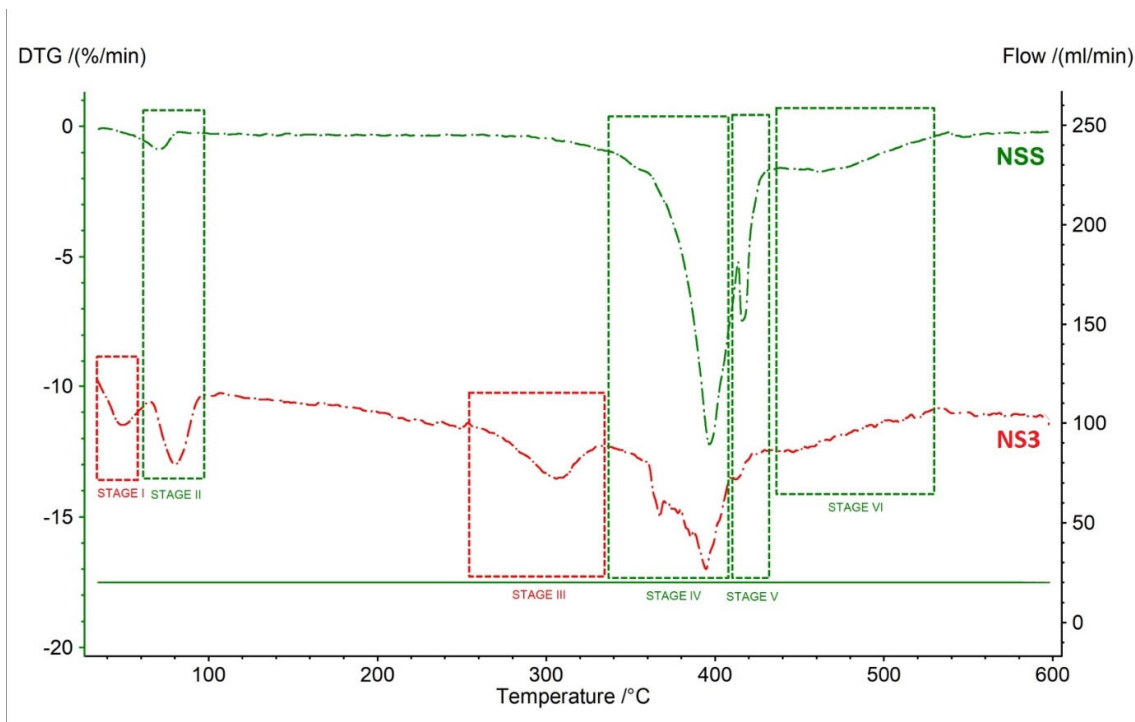

**Figure S6.** DTG curves of naproxen sodium standard (NSS), and pharmaceutical preparation containing naproxen sodium (NS3). The green frame shows the stages of decomposition related to the API, and the red frame - is associated with the excipient.

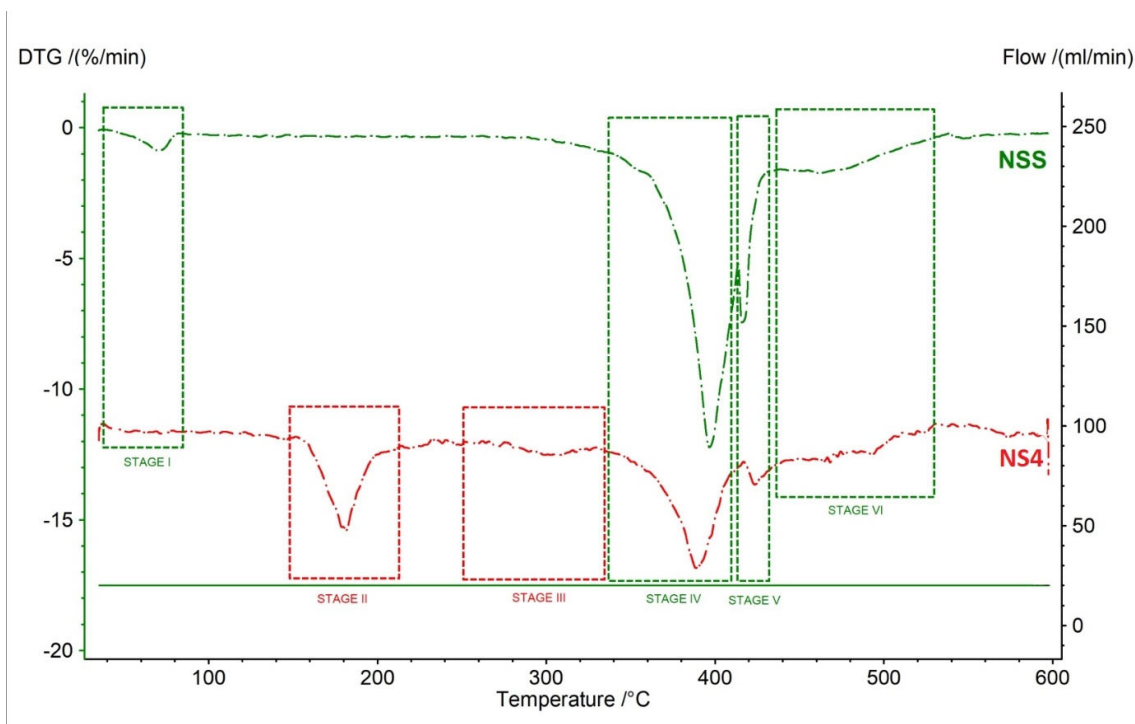

**Figure S7.** DTG curves of naproxen sodium standard (NSS), and pharmaceutical preparation containing naproxen sodium (NS4). The green frame shows the stages of decomposition related to the API, and the red frame - is associated with the excipient.

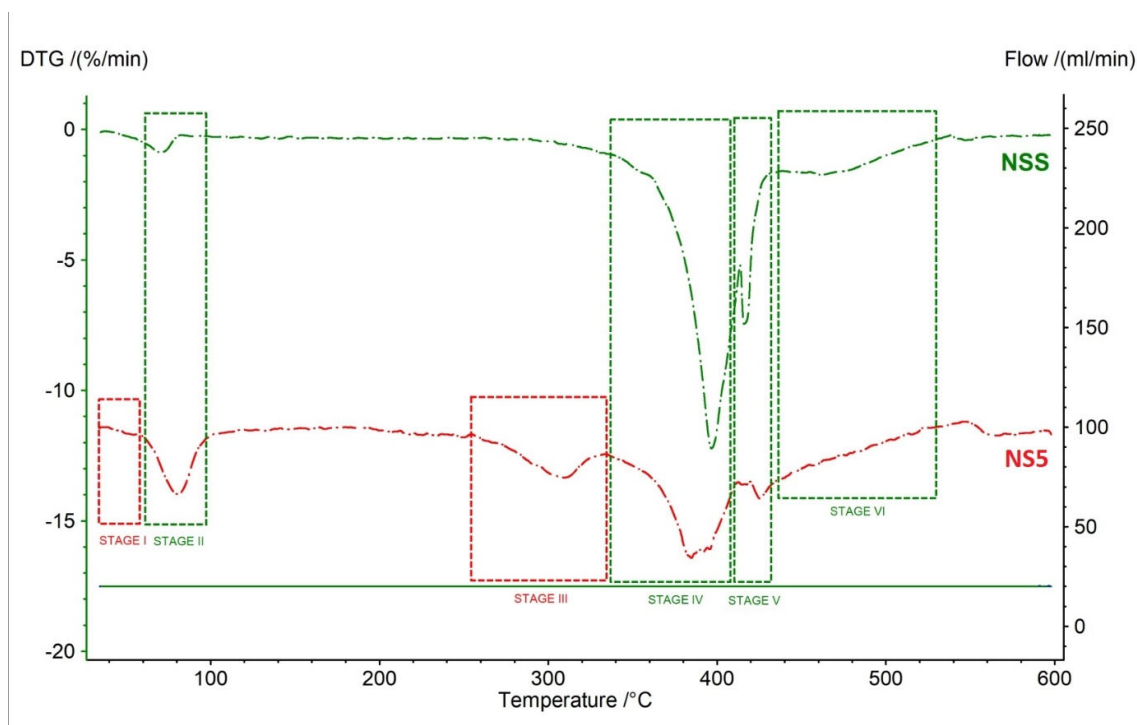

**Figure S8.** DTG curves of naproxen sodium standard (NSS), and pharmaceutical preparation containing naproxen sodium (NS5). The green frame shows the stages of decomposition related to the API, and the red frame - is associated with the excipient.
